# Supplementary material for: Increased Expression of X-Linked Genes in Mammals Is Associated with a Higher Stability of Transcripts and an Increased Ribosome Density
Source: PubMed Central journal article supplement (PMC4419800; doi:10.1093/gbe/evv054), 2015-03-18

chr1.p

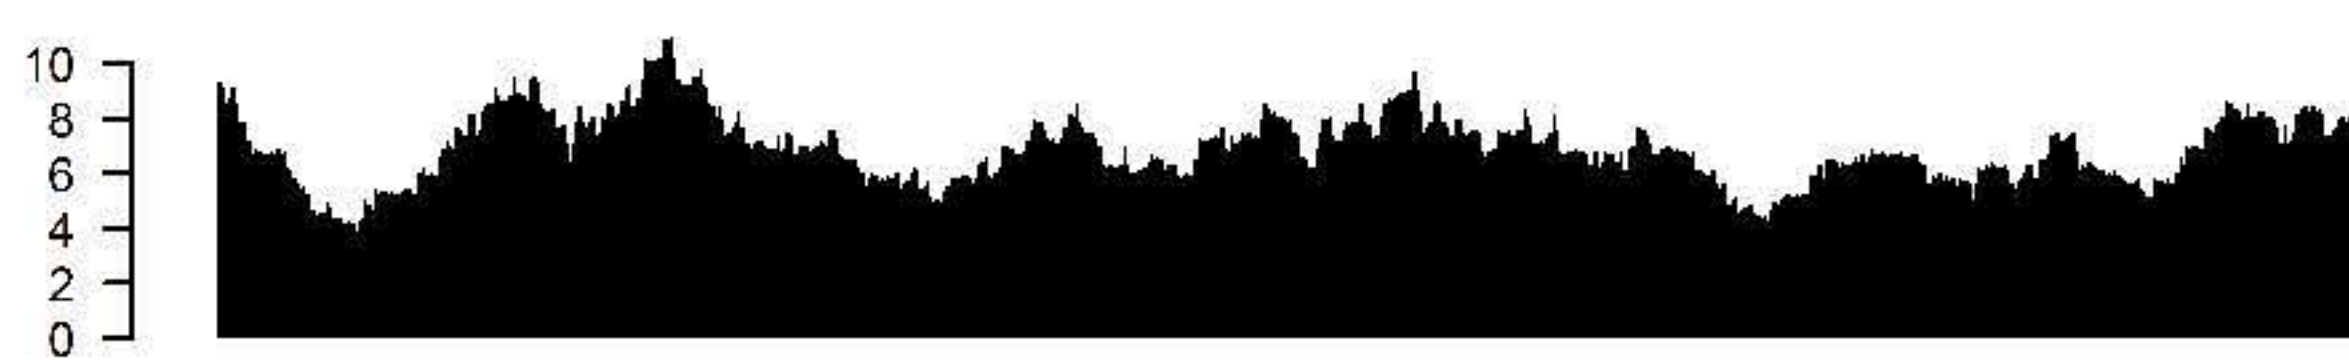

chr1.q

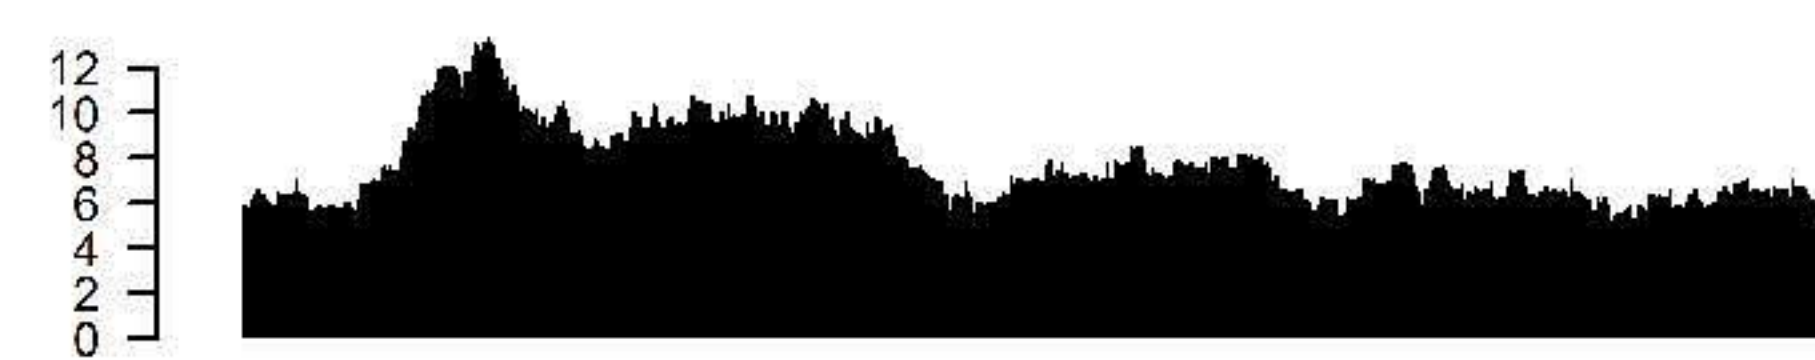

chr2.p

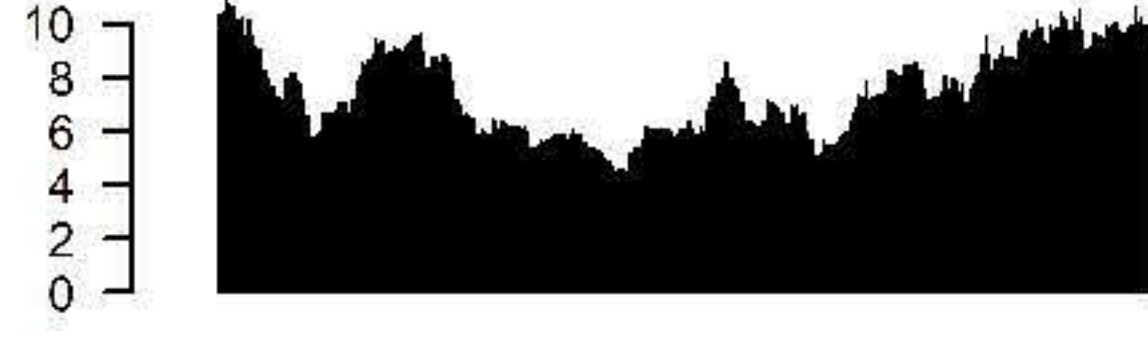

chr2.q

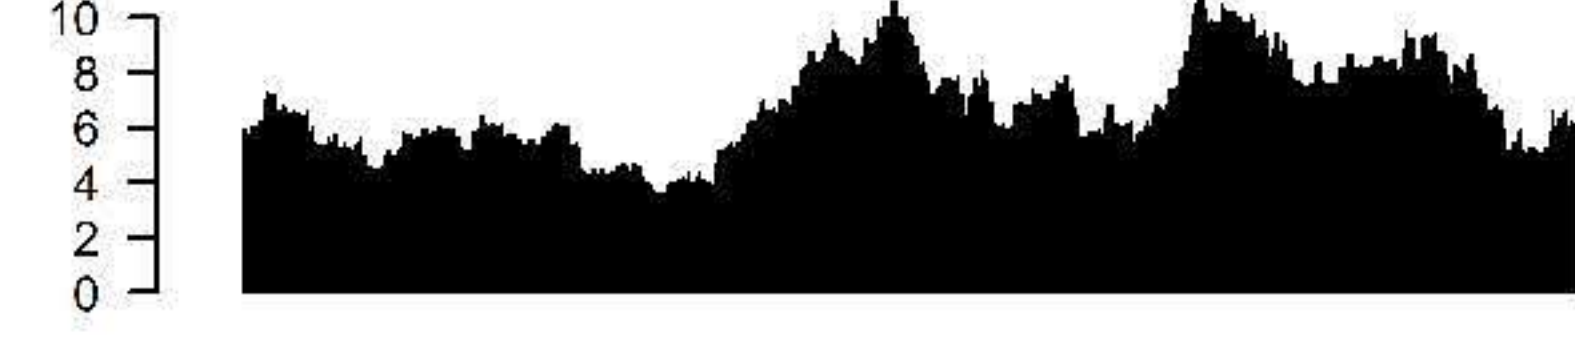

chr3.p

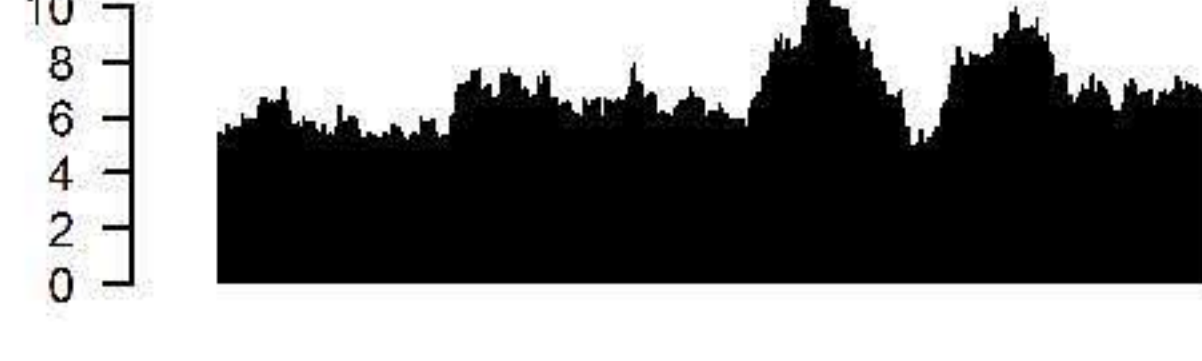

chr3.q

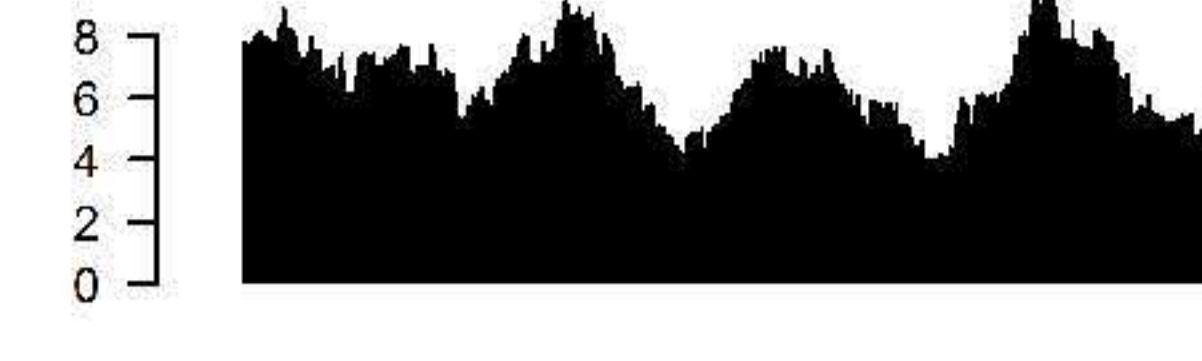

chr4.p

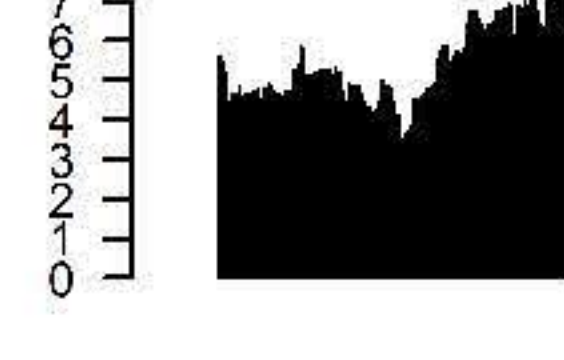

chr4.q

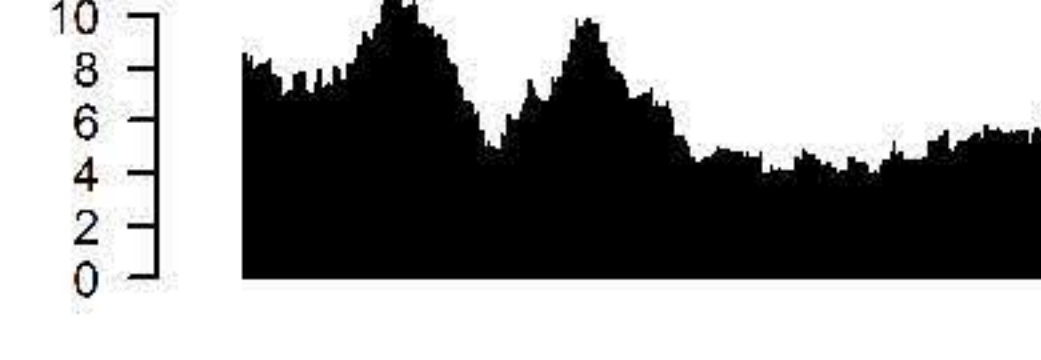

chr5.p

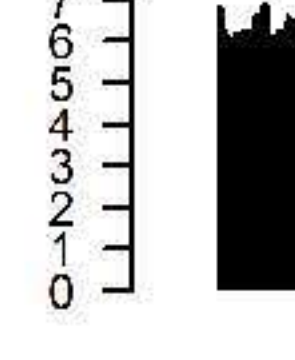

chr5.q

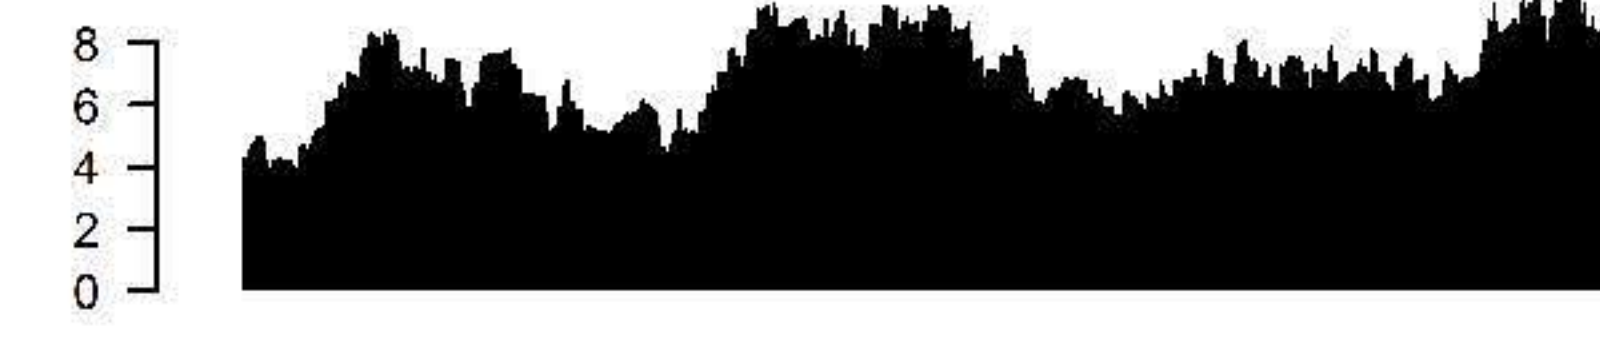

chr6.p

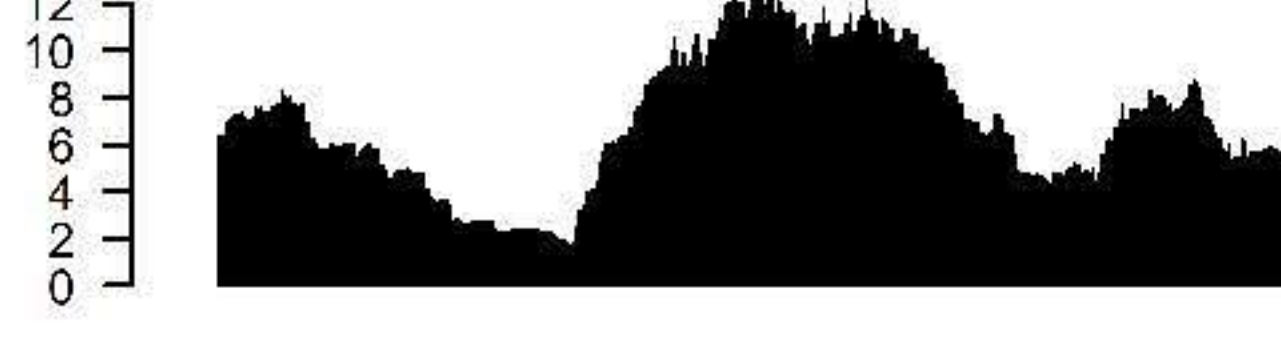

chr6.q

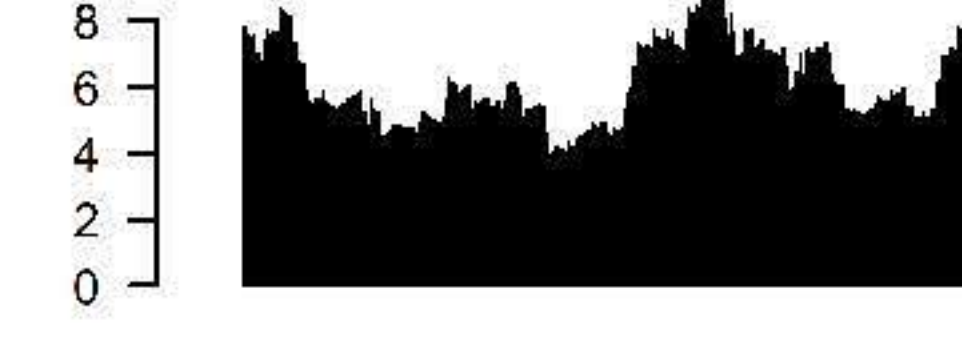

chr7.p

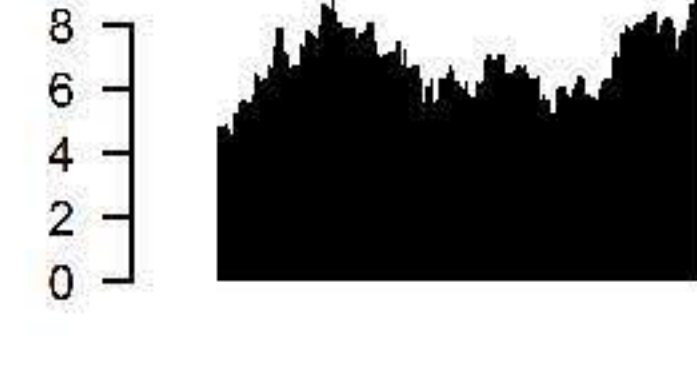

chr7.q

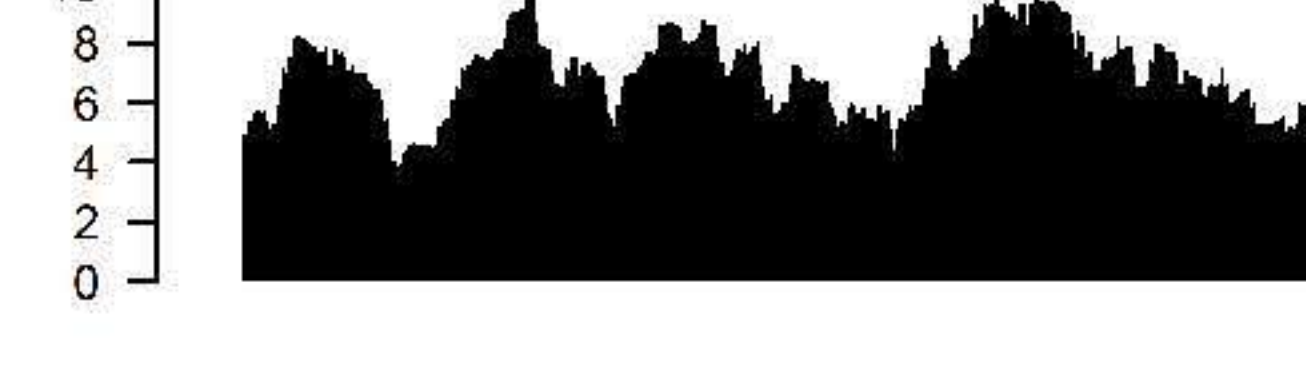

chr8.p

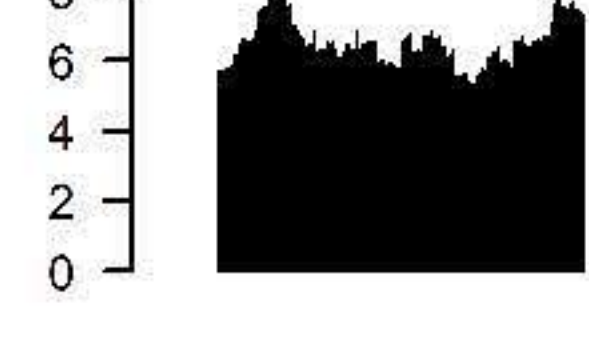

chr8.q

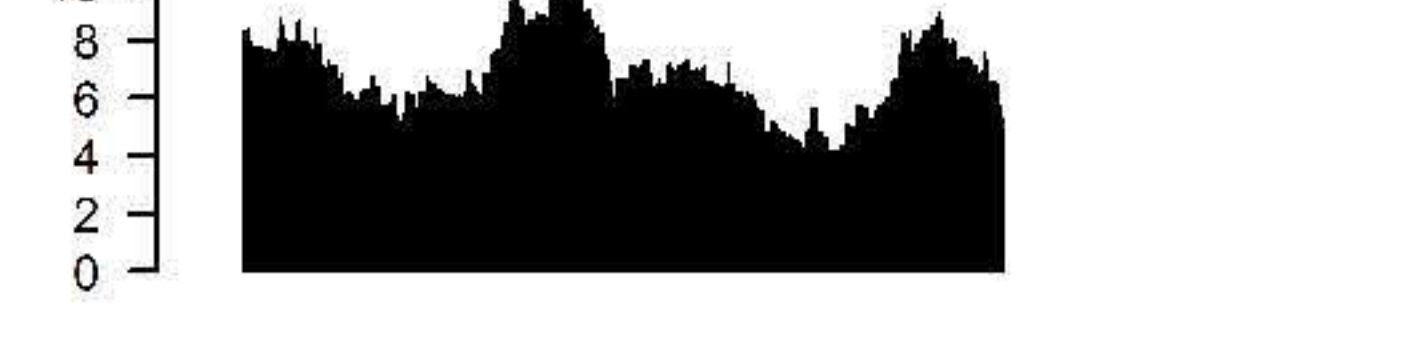

chr9.p

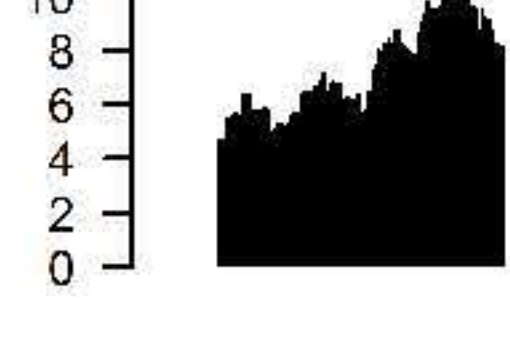

chr9.q

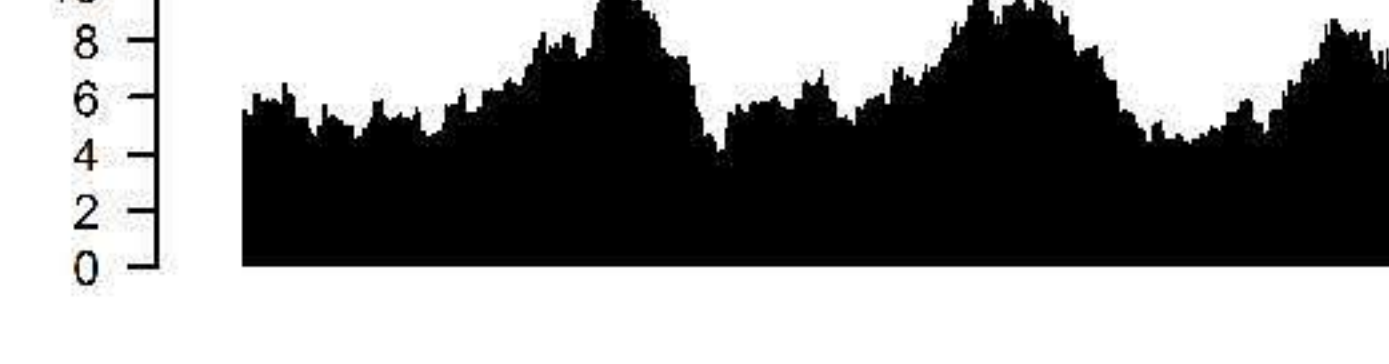

chr10.p

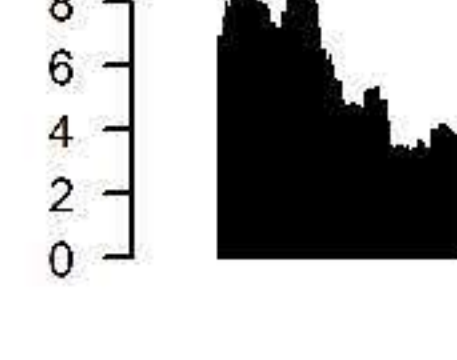

chr10.q

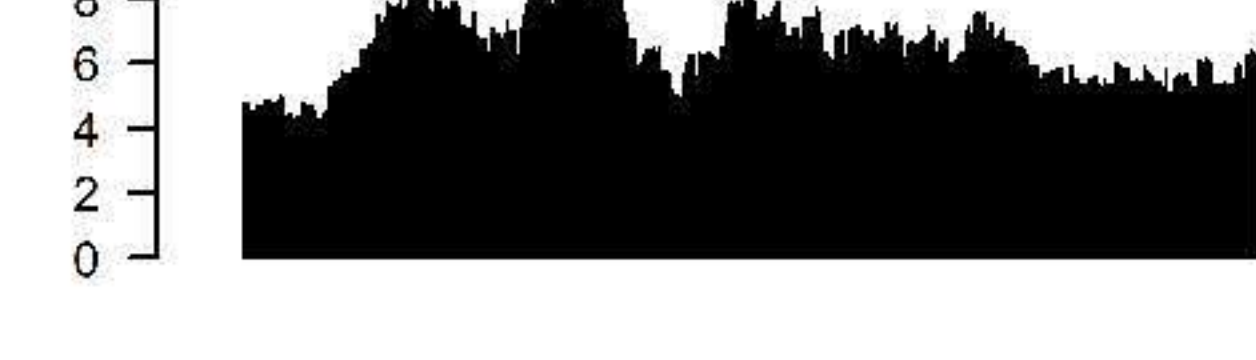

chr11.p

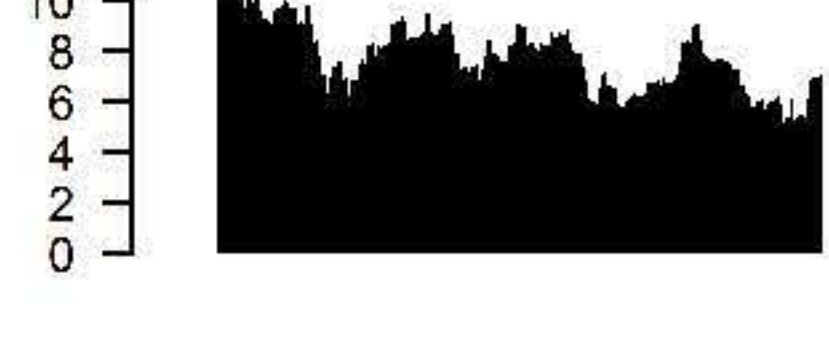

chr11.q

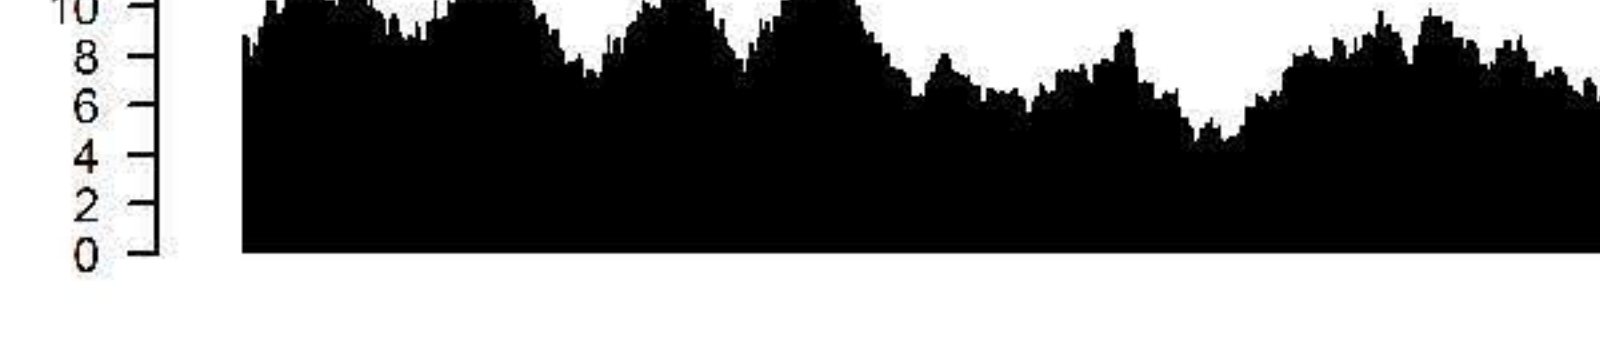

chr12.p

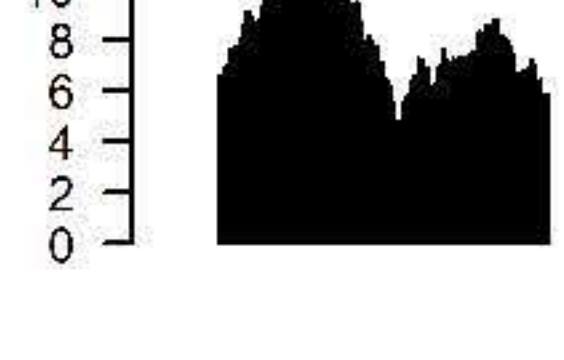

chr12.q

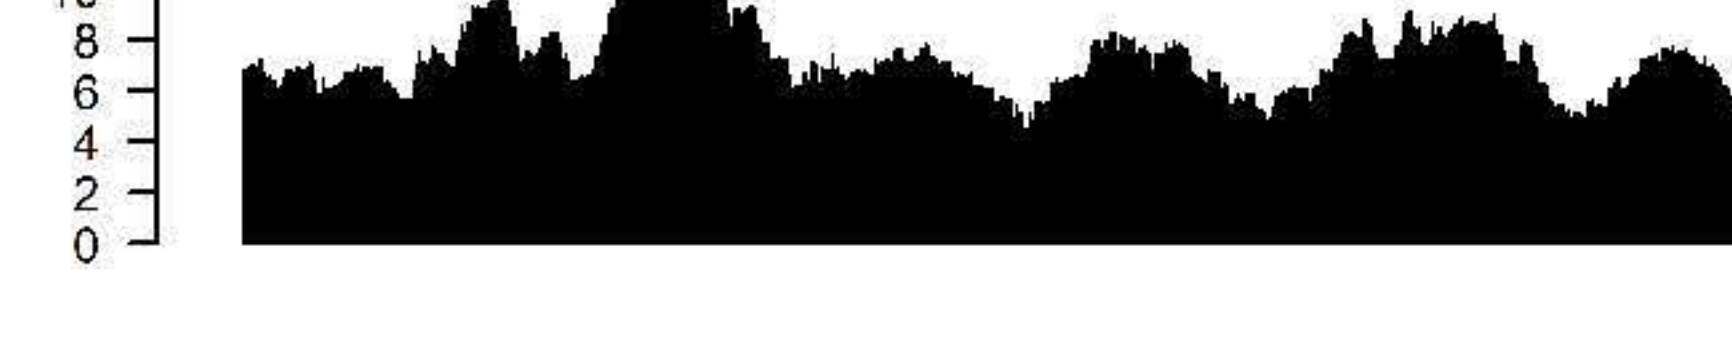

chr13.p

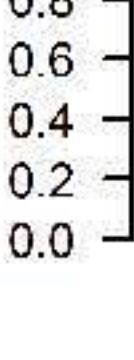

chr13.q

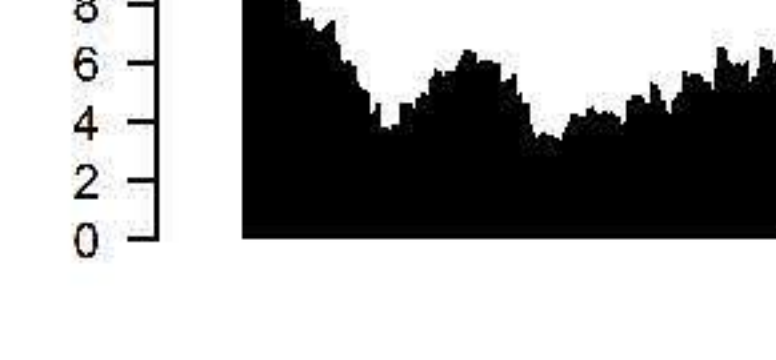

chr14.p

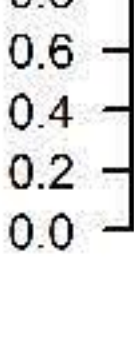

chr14.q

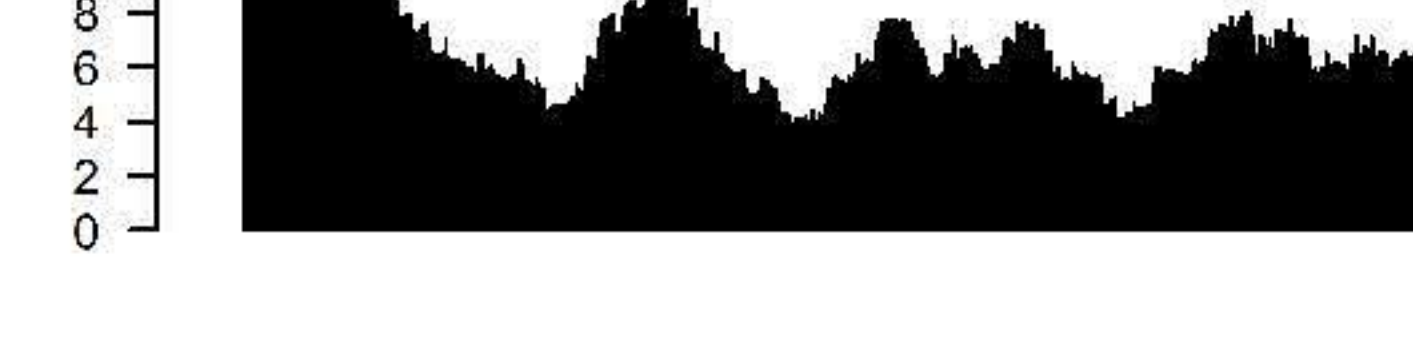

chr15.p

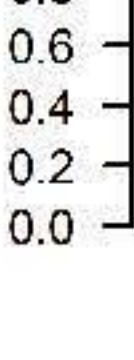

chr15.q

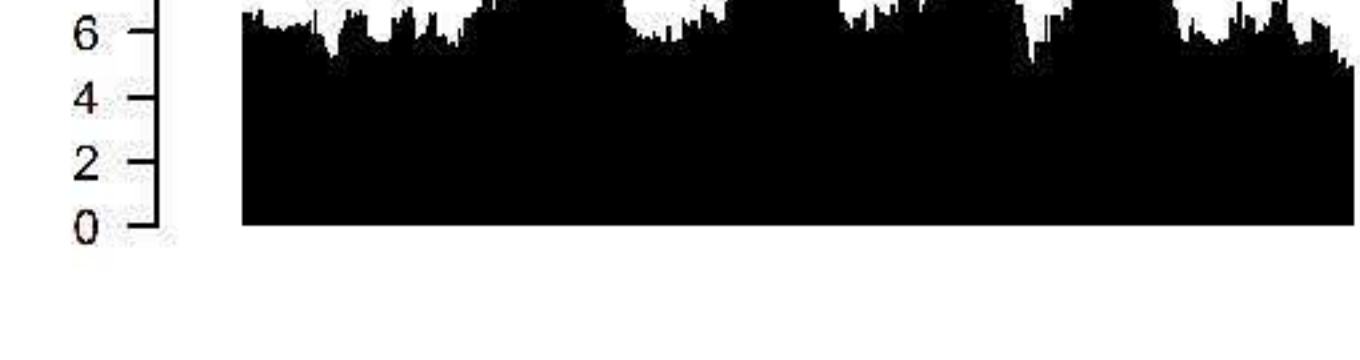

chr16.p

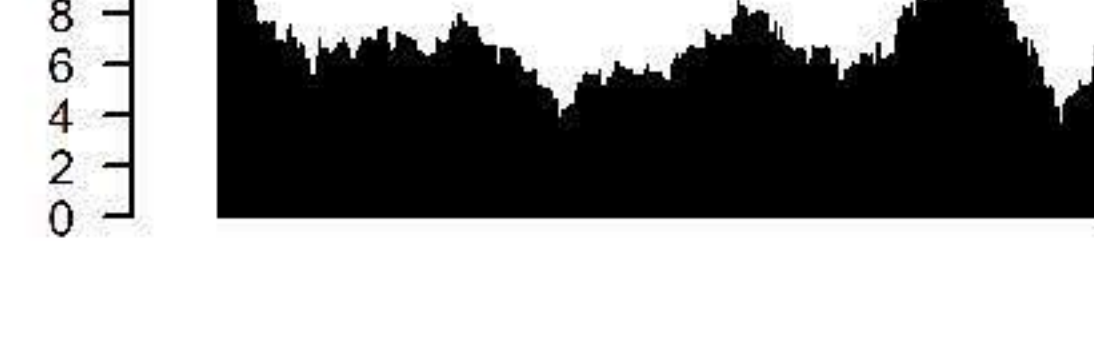

chr16.q

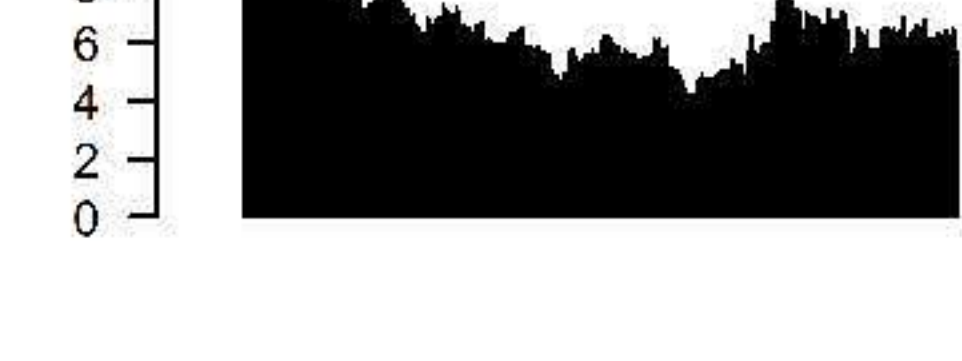

chr17.p

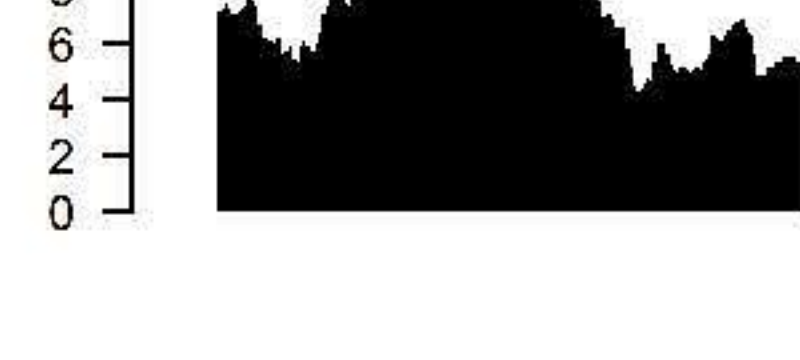

chr17.q

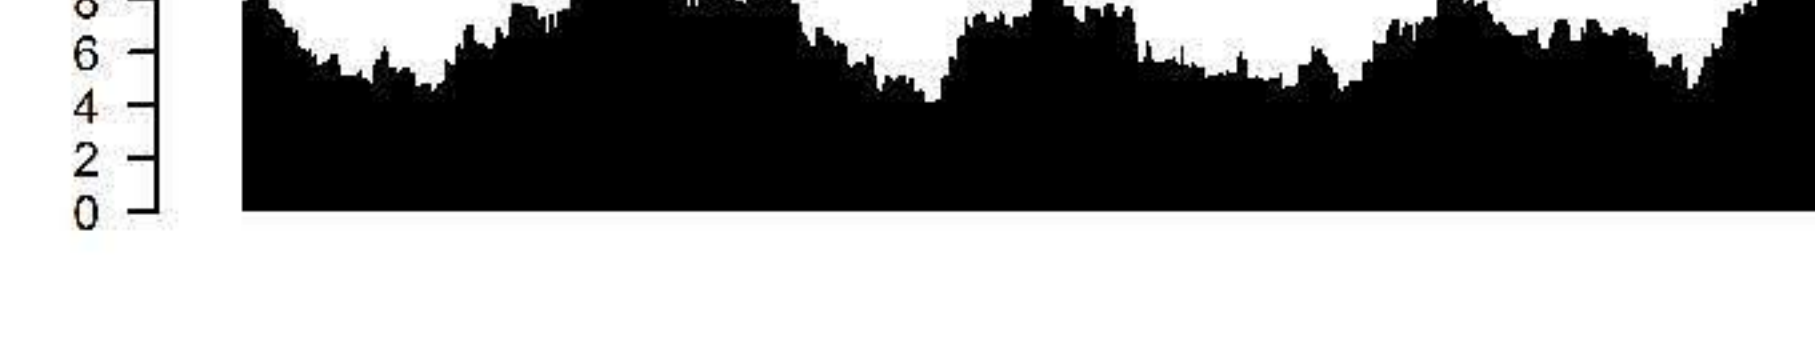

chr18.p

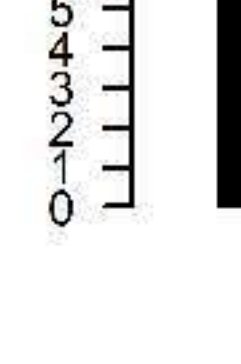

chr18.q

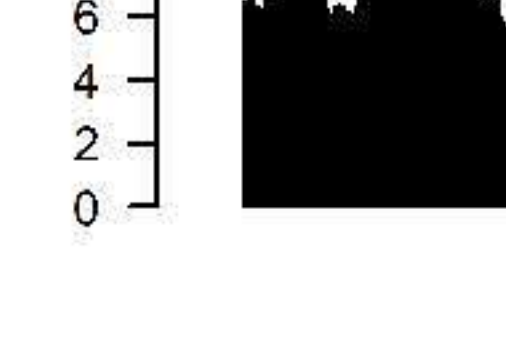

chr19.p

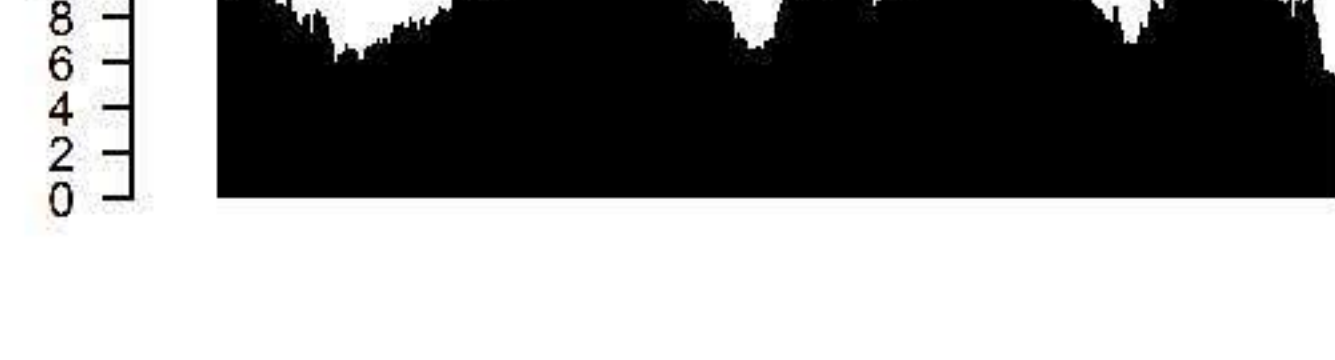

chr19.q

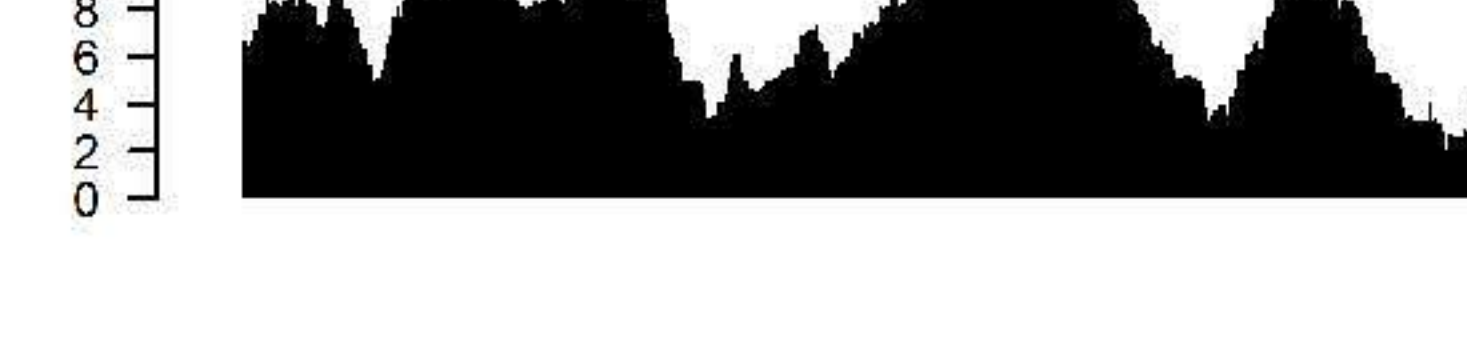

chr20.p

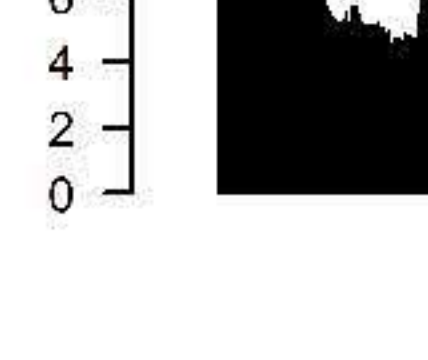

chr20.q

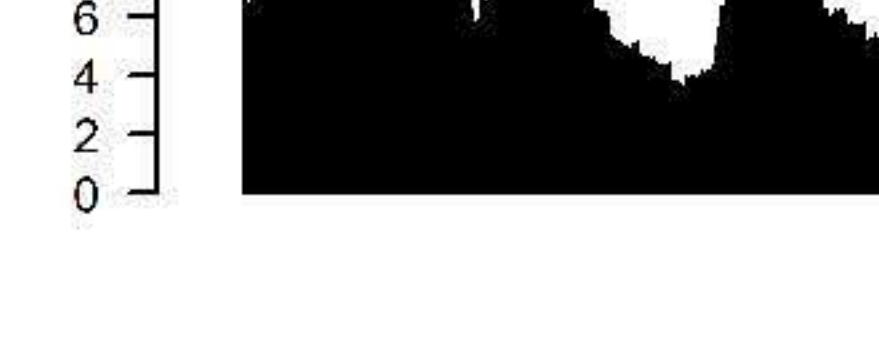

chr21.p

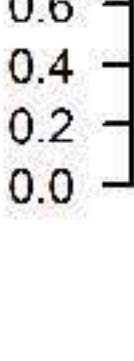

chr21.q

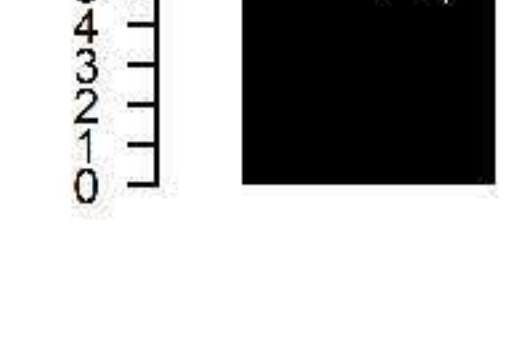

chr22.p

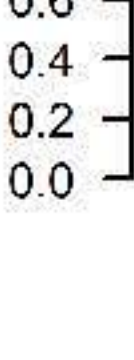

chr22.q

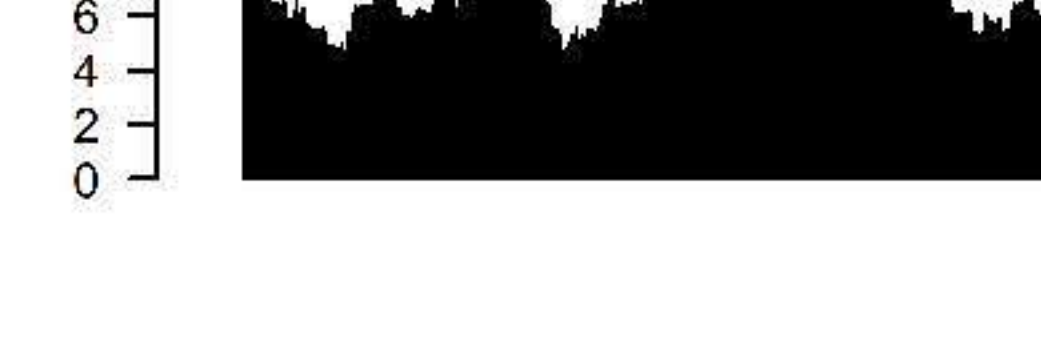

chrX.p

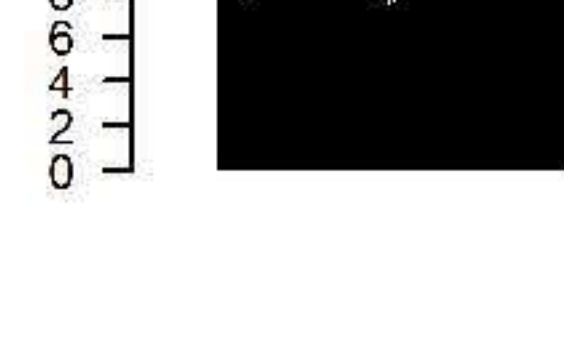

chrX.q

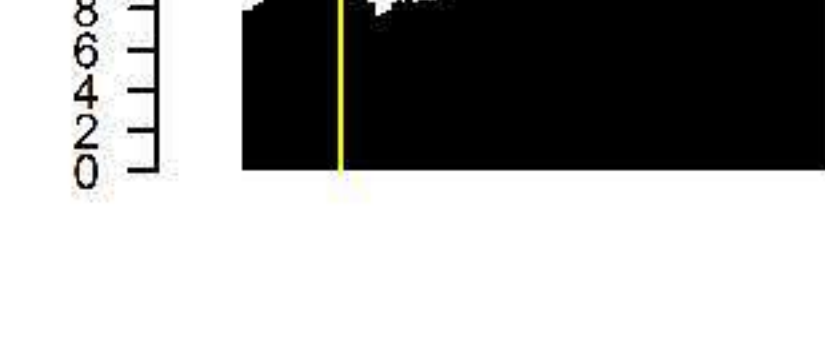

chrY.p

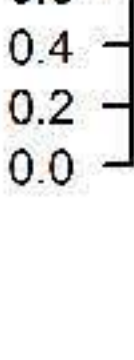

chrY.q

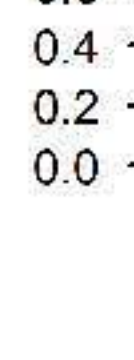

Supplement: supp_evv054_supplementary_fig2_resubmission.pdf [file supp_evv054_supplementary_fig2_resubmission.pdf]
