# Supplementary material for: Increased Expression of X-Linked Genes in Mammals Is Associated with a Higher Stability of Transcripts and an Increased Ribosome Density
Source: PubMed Central journal article supplement (PMC4419800; doi:10.1093/gbe/evv054), 2015-03-18

Supplementary figure 1

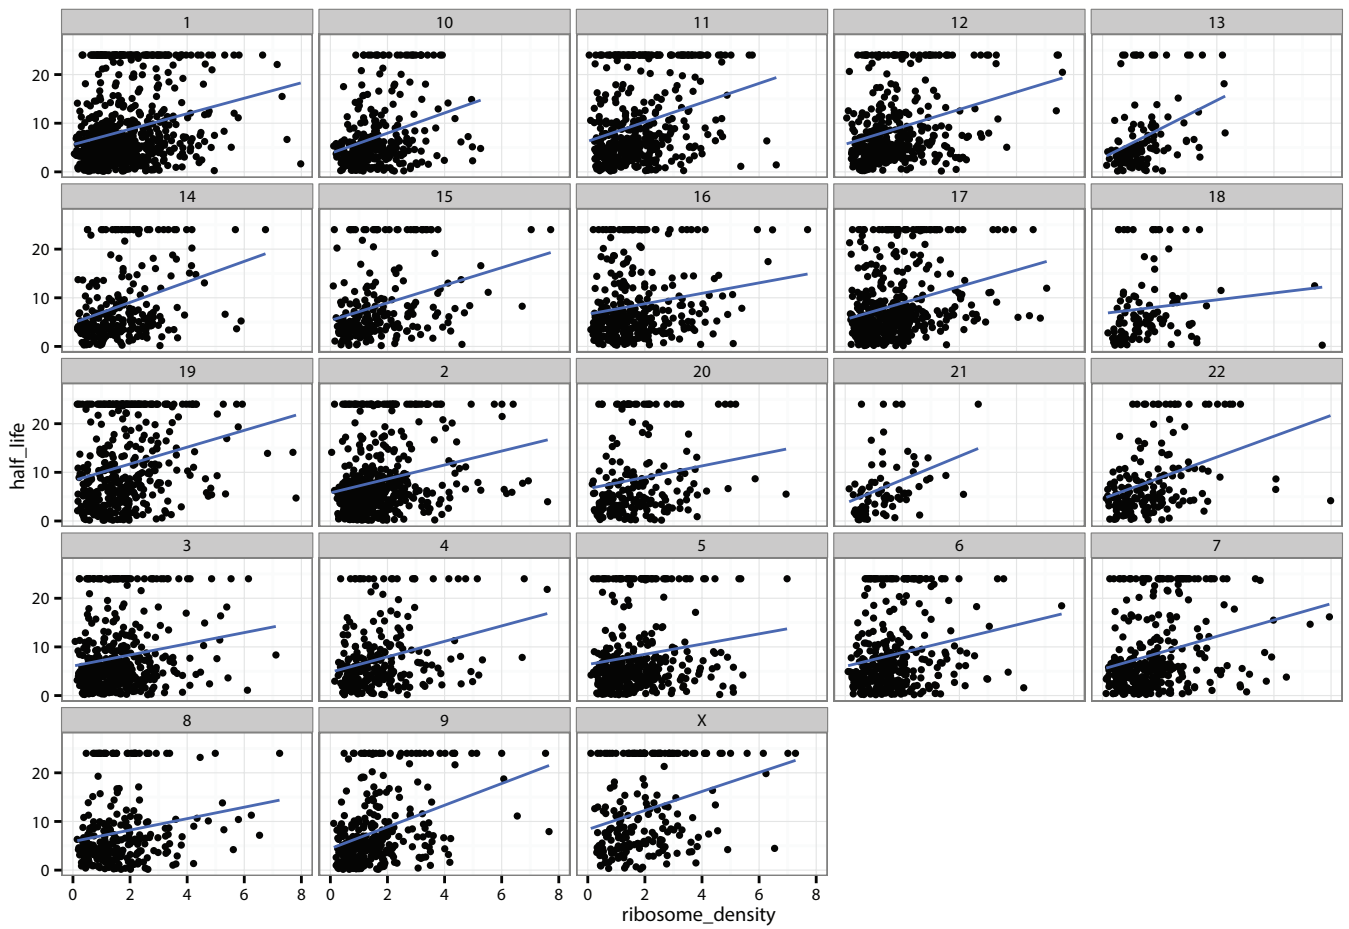

Supplement: supp_evv054_sup_fig1_A4.pdf [file supp_evv054_sup_fig1_A4.pdf]
